# Supplementary material for: Comparison of Characteristics of Deaths From Drug Overdose Before vs During the COVID-19 Pandemic in Rhode Island
Source: PubMed Central journal article supplement (PMC8449276; doi:10.1001/jamanetworkopen.2021.25538), 2021-09-17
Supplement: jamanetwopen-e2125538-s001.pdf [file jamanetwopen-e2125538-s001.pdf]

## Supplementary Online Content

Macmadu A, Batthala S, Correia Gabel AM, et al. Comparison of characteristics of deaths from drug overdose before vs during the COVID-19 pandemic in Rhode Island. *JAMA Netw Open*. 2021;4(9):e2125538.  
doi:10.1001/jamanetworkopen.2021.25538

**eTable.** Variable Code Details for Behavioral Health Treatment and Diagnosis Claims Sourced From Rhode Island Medicaid Claims and Enrollment Data

This supplementary material has been provided by the authors to give readers additional information about their work.

eTable. Variable Code Details for Behavioral Health Treatment and Diagnosis Claims Sourced From Rhode Island Medicaid Claims and Enrollment Data

| Variable                                         | Code details                                                                                                                                                                                                                                                                                                                                                                                                                                                                                                                                                                                                                                                                                                                                                                                                                                                                                |
|--------------------------------------------------|---------------------------------------------------------------------------------------------------------------------------------------------------------------------------------------------------------------------------------------------------------------------------------------------------------------------------------------------------------------------------------------------------------------------------------------------------------------------------------------------------------------------------------------------------------------------------------------------------------------------------------------------------------------------------------------------------------------------------------------------------------------------------------------------------------------------------------------------------------------------------------------------|
| Anxiety and fear related disorders               | F930, F940, F4000, F4001, F4002, F4010, F4011, F40210, F40218, F40220, F40228, F40230, F40231, F40232, F40233, F40240, F40241, F40242, F40243, F40248, F40290, F40291, F40298, F408, F409, F410, F411, F413, F418, F419, F064                                                                                                                                                                                                                                                                                                                                                                                                                                                                                                                                                                                                                                                               |
| Depression                                       | F320, F321, F322, F323, F324, F328, F3281, F3289, F329, F330, F331, F332, F333, F3341, F338, F339, F341, F0631, F0632                                                                                                                                                                                                                                                                                                                                                                                                                                                                                                                                                                                                                                                                                                                                                                       |
| Mental health treatment (outpatient)             | [Procedure_Code] IN ('H0046', '90834', '90847', '97150', '90791', '90837', '90833', '90834', '90836', '90853', '90785', '90792', '99408', '99409', 'H0049') AND [Diagnosis_1] NOT IN ('F11181', '30472', '30471', '30551', '30470', '30553', '30400', '30550', '30473', '30402', '30403', '30552', '30401', 'F1119', 'F11288', 'F1194', 'F11259', 'F11251', 'F11120', 'F11129', 'F11988', 'F11122', 'F11920', 'F11151', 'F11182', 'F11222', 'F1111', 'F11250', 'F11951', 'F1199', 'F11229', 'F11950', 'F1114', 'F11150', 'F1193', 'F1124', 'F11188', 'F1129', 'F11929', 'F1110', 'F11281', 'F11959', 'F1121', 'F11221', 'F11921', 'F11982', 'F11220', 'F1123', 'F11282', 'F11121', 'F11159', 'F1120', 'F1190', 'F11922', 'F11981', 'F1111')                                                                                                                                                 |
| Mental health treatment (inpatient) <sup>a</sup> | Diagnosis_1 in the list of codes AND [IP_Flag] = '1' AND [Billing_Provider_NPI] NOT IN ('1992884787', '1841323094', '1093848327', '1164822474', '1801966510', '1851303614', '1821078932', '1821218587', '1134281280', '1003045782', '1013332014', '1093713174', '1104847946', '1124198676', '1164822474', '1245239680', '1265595433', '1316917222', '1356343651', '1366501603', '1386671535', '1437191061', '1487916136', '1609925122', '1659379410', '1659517787', '1700913944', '1952699985', '1124170444', '1144606807', '1205278223', '1205968419', '1235207044', '1265752737', '1326267063', '1346519733', '1356338248', '1558557629', '1629123021', '1659591261', '1679919203', '1871515783', '1881684736', '1912038738', '1982914909', '1992128540')                                                                                                                                 |
| Opioid use disorder                              | F11181, 30472, 30471, 30551, 30470, 30553, 30400, 30550, 30473, 30402, 30403, 30552, 30401, F1119, F11288, F1194, F11259, F11251, F11120, F11129, F11988, F11122, F11920, F11151, F11182, F11222, F1111, F11250, F11951, F1199, F11229, F11950, F1114, F11150, F1193, F1124, F11188, F1129, F11929, F1110, F11281, F11959, F1121, F11221, F11921, F11982, F11220, F1123, F11282, F11121, F11159, F1120, F1190, F11922, F11981                                                                                                                                                                                                                                                                                                                                                                                                                                                               |
| Alcohol use disorder                             | G312, F10920, F10921, F10929, F1094, F10950, F10951, F10959, F1096, F1097, F10980, F10981, F10982, F10988, F1099, F1010, F10120, F10121, F10129, F1014, F10150, F10151, F10159, F10180, F10181, F10182, F10188, F1019, F1020, F10220, F10221, F10229, F10230, F10231, F10232, F10239, F1024, F10250, F10251, F10259, F1026, F1027, F10280, F10281, F10282, F10288, F1029                                                                                                                                                                                                                                                                                                                                                                                                                                                                                                                    |
| Any substance use disorder                       | F18150, F18151, F18159, F1817, F18180, F18188, F1819, F1820, F1821, F18220, F18221, F18229, F1824, F1897, F18980, F18988, F1899, F1910, F1911, F19120, F19121, F19122, F19129, F1914, F19150, F19151, F19159, F1916, F1917, F19180, F19181, F19182, F19188, F1919, F1920, F1921, F19220, F19221, F19222, F19229, F19230, F19231, F19232, F19239, F1924, F19250, F19251, F19259, F1926, F1927, F19280, F19281, F19282, F19288, F1929, F1990, F19920, F19921, F19922, F19929, F19930, F19931, F19932, F19939, F1994, F19950, F19951, F19959, F1996, F1997, F19980, F19981, F19982, F19988, F1999, F15121, F15122, F15129, F1514, F1529, F1590, F15920, F15921, F15922, F15929, F1593, F1594, F15950, F15951, F15959, F15980, F15981, F15982, F15988, F1599, F1610, F1611, F16120, F16121, F16122, F16129, F1614, F16150, F16151, F16159, F16180, F16183, F16188, F1619, F1620, F1621, F16220, |

|                   |                                                                                                                                                                                                                                                                                                                                                                                                                                                                                                                                                                                                                                                                                                                                                                                                                                                                                                                                                                                                                                                                                                                                                                                                                                                                                                                                                                                                                                                                                                                                                                                                                                                                                                                                                                                                                                                                                                                                                                                                                                                                                                                                                                                                        |
|-------------------|--------------------------------------------------------------------------------------------------------------------------------------------------------------------------------------------------------------------------------------------------------------------------------------------------------------------------------------------------------------------------------------------------------------------------------------------------------------------------------------------------------------------------------------------------------------------------------------------------------------------------------------------------------------------------------------------------------------------------------------------------------------------------------------------------------------------------------------------------------------------------------------------------------------------------------------------------------------------------------------------------------------------------------------------------------------------------------------------------------------------------------------------------------------------------------------------------------------------------------------------------------------------------------------------------------------------------------------------------------------------------------------------------------------------------------------------------------------------------------------------------------------------------------------------------------------------------------------------------------------------------------------------------------------------------------------------------------------------------------------------------------------------------------------------------------------------------------------------------------------------------------------------------------------------------------------------------------------------------------------------------------------------------------------------------------------------------------------------------------------------------------------------------------------------------------------------------------|
|                   | F16221, F16229, F1624, F16250, F16251, F16259, F16280, F16283, F16288, F1629, F1690, F16920, F16921, F16929, F1694, F16950, F16951, F16959, F16980, F16983, F16988, F1699, F17200, F17201, F17203, F17208, F17209, F17210, F17211, F17213, F17218, F17219, F17220, F17221, F17223, F17228, F17229, F17290, F17291, F17293, F17298, F17299, F1810, F1811, F18120, F18121, F18129, F1814, F18250, F18251, F18259, F1827, F18280, F18288, F1829, F1890, F18920, F18921, F18929, F1894, F18950, F18951, F18959, F13231, F13232, F13239, F1324, F13250, F13251, F13259, F1326, F1327, F13280, F13281, F13282, F13288, F1329, F1390, F13920, F13921, F13929, F13930, F13931, F13932, F13959, F1396, F1397, F13980, F13981, F13982, F13988, F1399, F1410, F1411, F14120, F14121, F14122, F14129, F1414, F14150, F14151, F14159, F14180, F14181, F14182, F14188, F1419, F1420, F1421, F14220, F14221, F14222, F14229, F1423, F1424, F14250, F14251, F14259, F14280, F14281, F14282, F14288, F1429, F1490, F14920, F14921, F14922, F14929, F1494, F14950, F14951, F14959, F14980, F14981, F14982, F14988, F1499, F1510, F1511, F15120, F15150, F15151, F15159, F15180, F15181, F15182, F15188, F1519, F1520, F1521, F15220, F15221, F15222, F15229, F1523, F1524, F15250, F15251, F15259, F15280, F15281, F15282, F15288, F10920, F10921, F10929, F1094, F10950, F10951, F10959, F1096, F1097, F10980, F10981, F10982, F10988, F1099, F1121, F1210, F1211, F12120, F12121, F12122, F12129, F12150, F12151, F12159, F12180, F12188, F1219, F1220, F1221, F12220, F12221, F12222, F12229, F1223, F12250, F12251, F12259, F12280, F12288, F1229, F1290, F12920, F12921, F12922, F12929, F1293, F12950, F12951, F12959, F12980, F12988, F1299, F1310, F1311, F13120, F13121, F13129, F1314, F13150, F13151, F13159, F13180, F13181, F13182, F13188, F1319, F1320, F1321, F13220, F13221, F13229, F13230, F13939, F1394, F13950, F13951, F1010, F1011, F10120, F10121, F10129, F1014, F10150, F10151, F10159, F10180, F10181, F10182, F10188, F1019, F1020, F1021, F10220, F10221, F10229, F10230, F10231, F10232, F10239, F1024, F10250, F10251, F10259, F1026, F1027, F10280, F10281, F10282, F10288, F1029, F1111 |
| Nonfatal overdose | ([ED_Flag] = '1' OR [Revenue_Code] IN ('0450', '0451', '0452', '0453', '0454', '0455', '0456', '0457', '0458', '0459')) AND [Diagnosis_Code] IN -- ICD-9 Codes ('96500', '96501', '96502', '96509', '9701', 'E8500', 'E8501', 'E8502', 'E9350', 'E9351', 'E9352', 'E9401', -- ICD-10 Codes 'T400X1A', 'T400X1D', 'T400X2A', 'T400X2D', 'T400X3A', 'T400X3D', 'T400X4A', 'T400X4D', 'T401X1A', 'T401X1D', 'T401X2A', 'T401X2D', 'T401X3A', 'T401X3D', 'T401X4A', 'T401X4D', 'T402X1A', 'T402X1D', 'T402X2A', 'T402X2D', 'T402X3A', 'T402X3D', 'T402X4A', 'T402X4D', 'T403X1A', 'T403X1D', 'T403X2A', 'T403X2D', 'T403X3A', 'T403X3D', 'T403X4A', 'T403X4D', 'T404X1A', 'T404X1D', 'T404X2A', 'T404X2D', 'T404X3A', 'T404X3D', 'T404X4A', 'T404X4D', 'T40601A', 'T40601D', 'T40602A', 'T40602D', 'T40603A', 'T40603D', 'T40604A', 'T40604D', 'T40691A', 'T40691D', 'T40692A', 'T40692D', 'T40693A', 'T40693D', 'T40694A', 'T40694D', 'T400X5A', 'T400X5D', 'T402X5A', 'T402X5D', 'T403X5A', 'T403X5D', 'T404X5A', 'T404X5D', 'T40605A', 'T40605D', 'T40695A', 'T40695D')                                                                                                                                                                                                                                                                                                                                                                                                                                                                                                                                                                                                                                                                                                                                                                                                                                                                                                                                                                                                                                                                                                                                 |
| Methadone         | ICD code: H0020                                                                                                                                                                                                                                                                                                                                                                                                                                                                                                                                                                                                                                                                                                                                                                                                                                                                                                                                                                                                                                                                                                                                                                                                                                                                                                                                                                                                                                                                                                                                                                                                                                                                                                                                                                                                                                                                                                                                                                                                                                                                                                                                                                                        |
| Buprenorphine     | RED.[Therapeutic_Class_Code] = '2808120005' AND NOT (RED.Product_Name IN ('BUTRANS', 'BELBUCA', 'BUPRENEX') OR RED.National_Drug_Code IN ('00409201232', '42023017905', '00093360040', '00093360140', '00093360240', '00093360340', '00093365640', '00093365740', '00093365840', '00093365940', '42858035340', '42858049340', '42858058640', '42858075040', '42858083940'))                                                                                                                                                                                                                                                                                                                                                                                                                                                                                                                                                                                                                                                                                                                                                                                                                                                                                                                                                                                                                                                                                                                                                                                                                                                                                                                                                                                                                                                                                                                                                                                                                                                                                                                                                                                                                            |

<sup>a</sup>There are over 1500 Diagnosis\_1 codes included in this definition. The authors will make these codes available upon request.
